# Supplementary material
Source: PubMed Central journal article supplement (PMC4560776)
Supplement: ncomms9054-s1.pdf [file ncomms9054-s1.pdf]

# Supplementary Figure 1

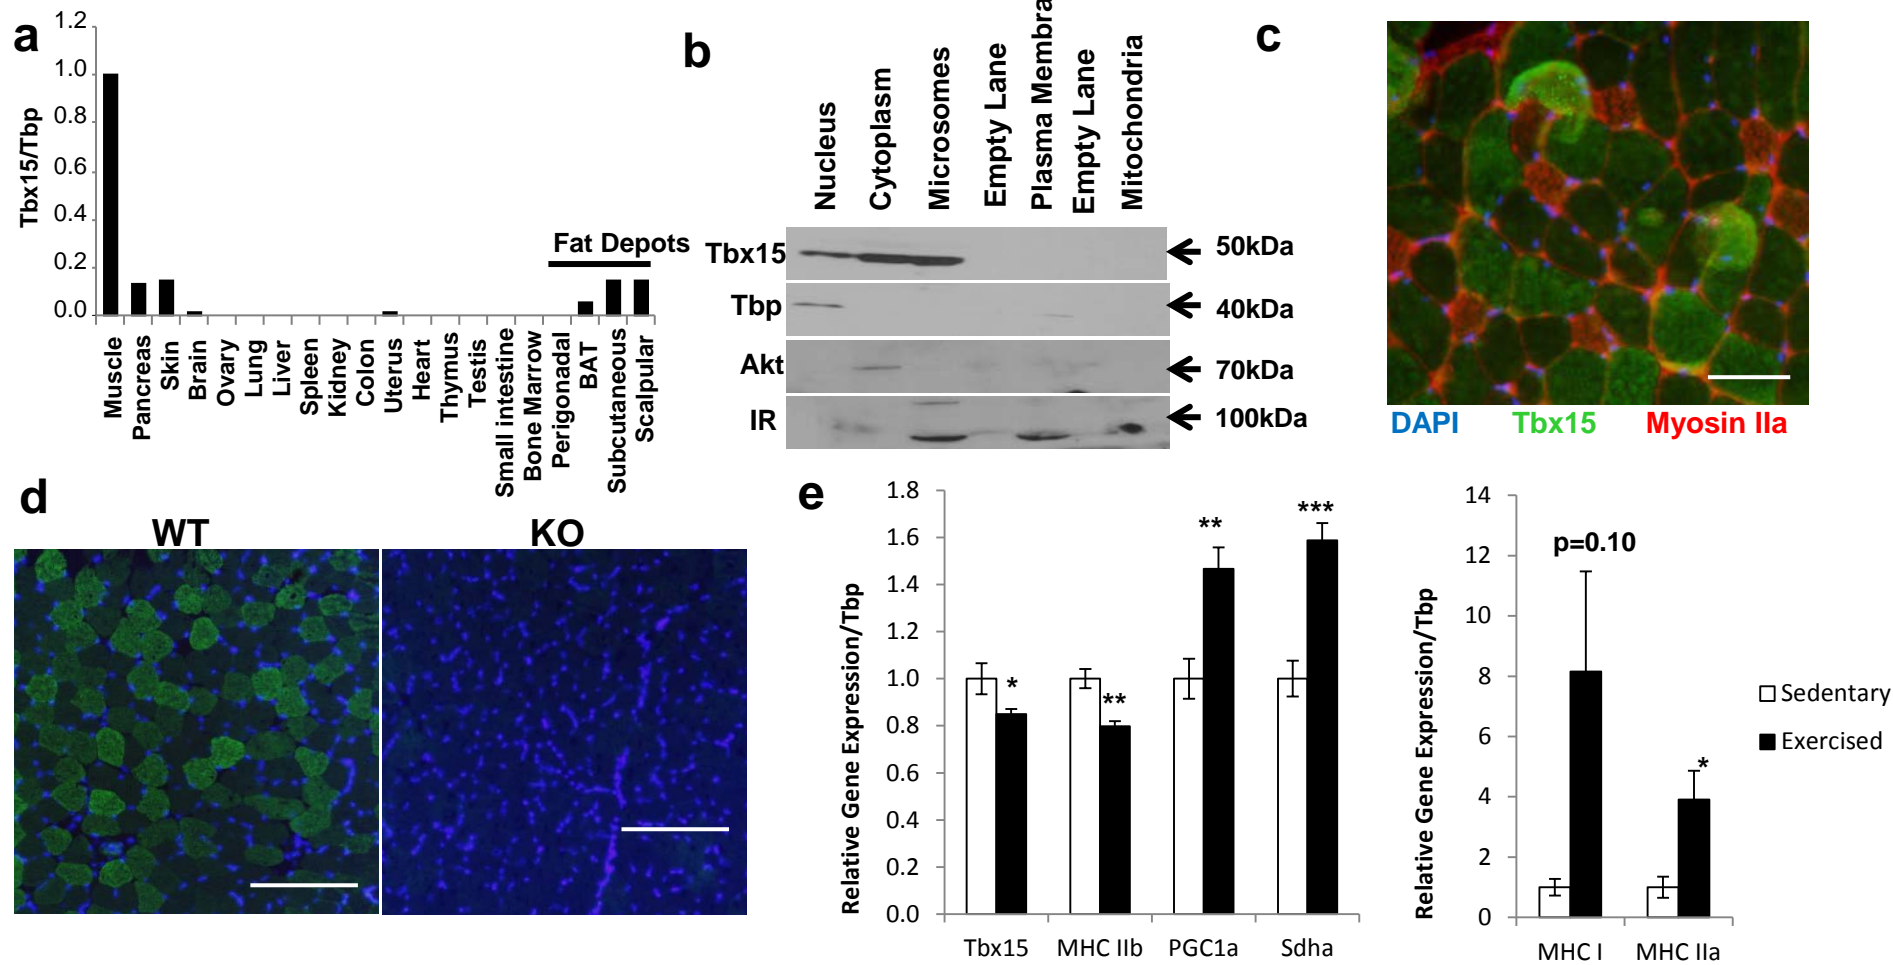

**Supplementary Figure 1. *Tbx15* is up-regulated during C2C12 differentiation.**

a) Expression level of *Tbx15* mRNA was compared using quantitative real-time PCR (qPCR) of RNA isolated from tissues from of 8 week old male and female (ovary and uterus) C57BL/6 mice. Data are shown as mean ± SEM of four samples.

b) Western blot for *Tbx15* from of fractionated muscle tissue from 8 week old mice. Tata binding protein (*Tbp*), Akt, and insulin receptor (*IR*) are run as controls.

c) Double immunofluorescence for *Tbx15* (green) and myosin IIa (red) on tibialis anterior muscle of 8 weeks old mice. The photograph was taken at 10x magnification. Scale bar = 50 μm.

d) Immunofluorescence for *Tbx15* (green) on tibialis anterior muscle of WT and *Tbx15*<sup>-/-</sup> at 8 weeks old mice. The photograph was taken at 10x magnification. Scale bar = 100 μm.

e) Expression level of *Tbx15* mRNA, myosin heavy chains, and markers of oxidative metabolism was compared using quantitative real-time PCR (qPCR) of RNA isolated from triceps of from of male C57BL/6 mice given free access to wheel cages for three weeks to those house in standard cages. Data are shown as mean ± SEM of six samples.

# Supplementary Figure 2a-c

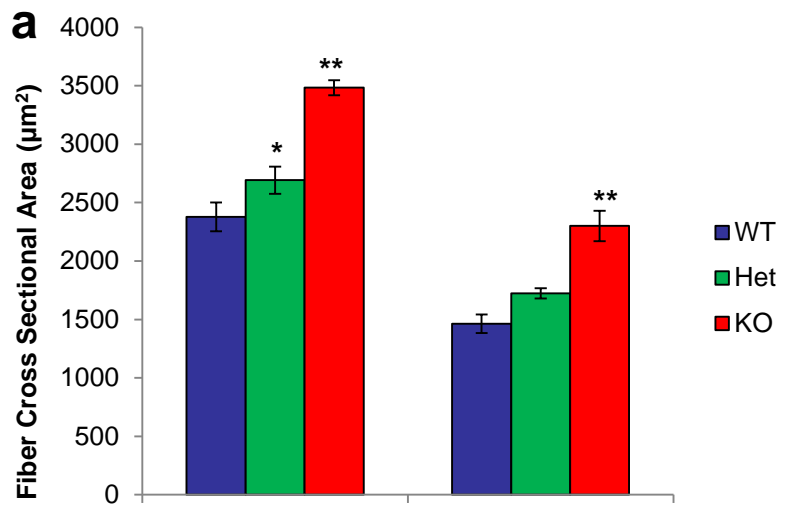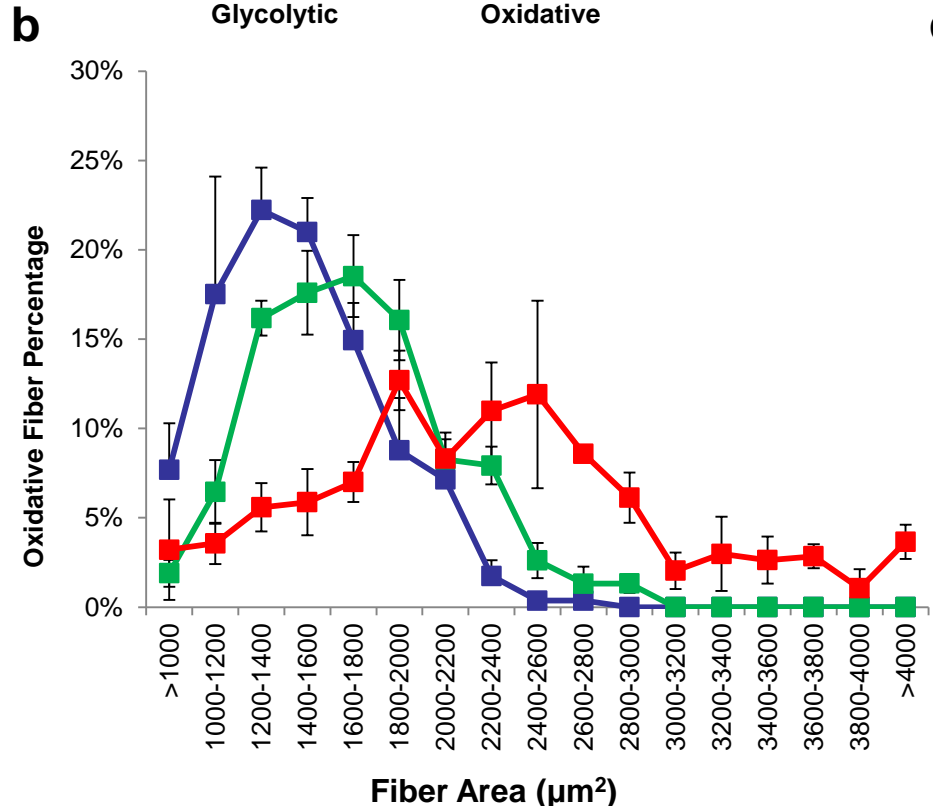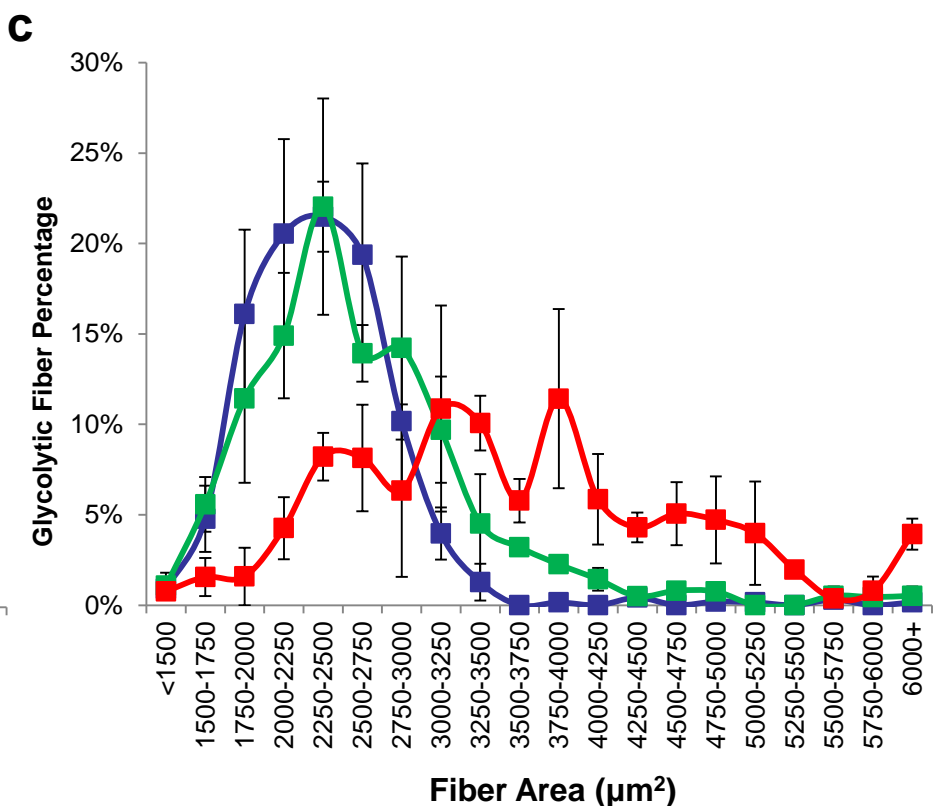

# Supplemental Figure 2d-g

d

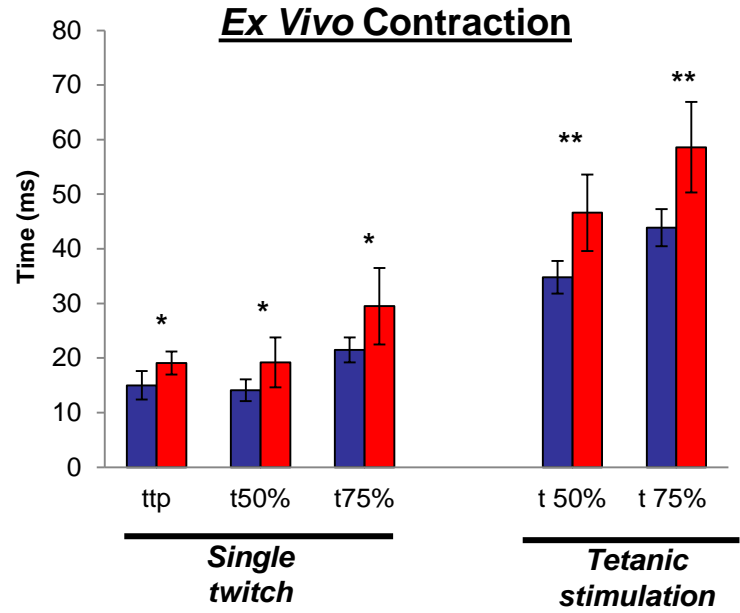

e

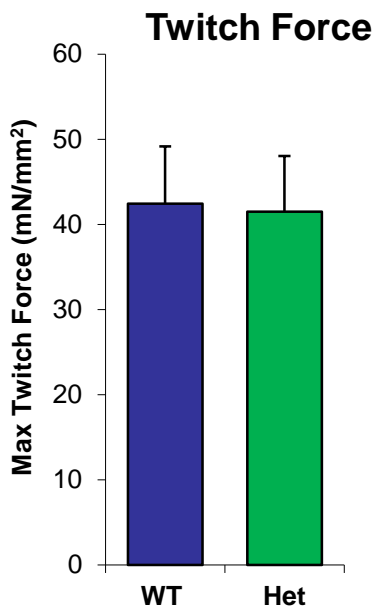

f

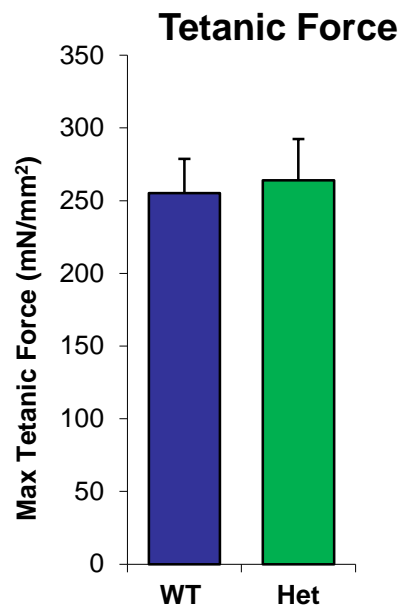

g

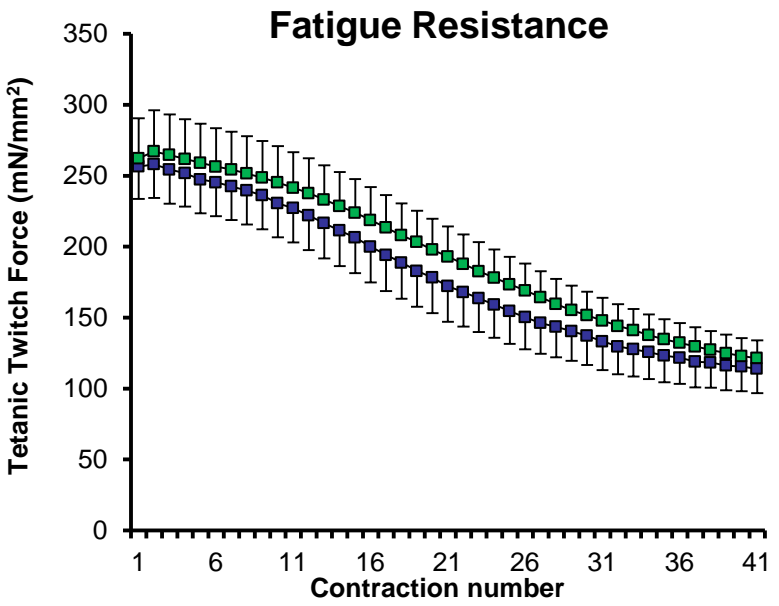

# Supplementary Figure 2h-j

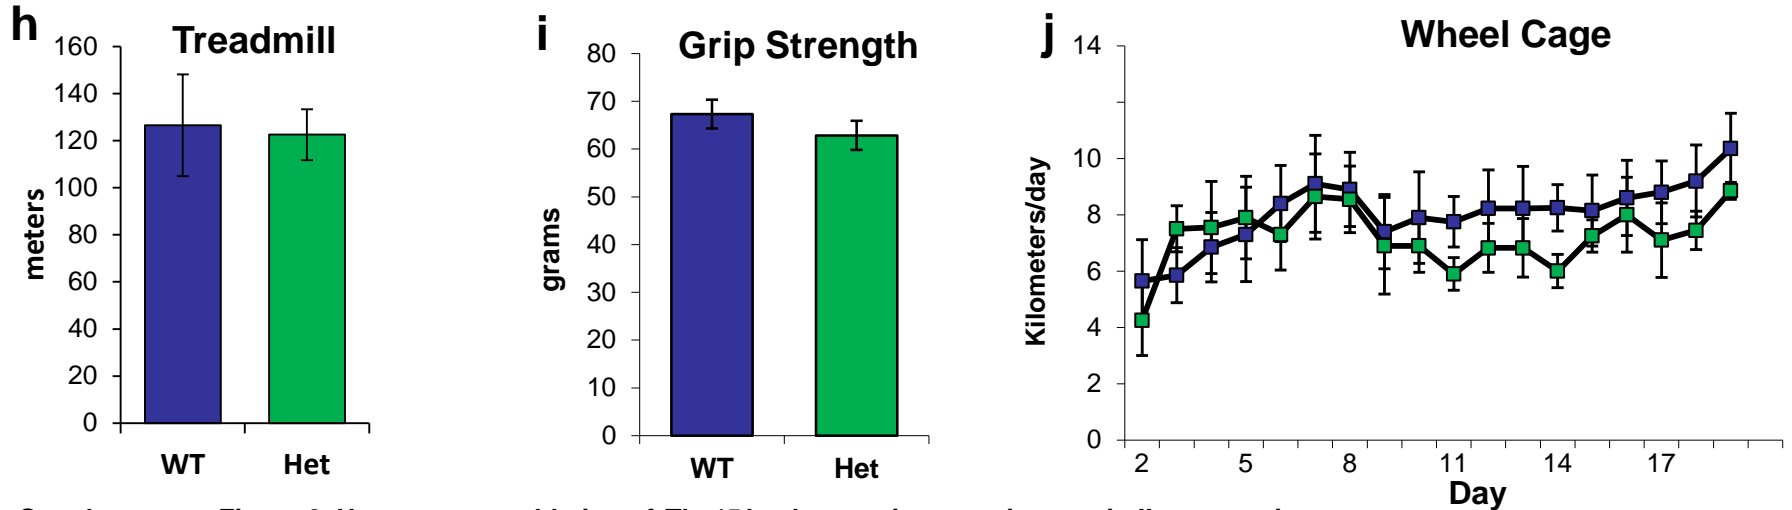

## Supplementary Figure 2. Heterozygous ablation of *Tbx15* leads to an increase in myosin IIa expression.

- a) Cross sectional area of oxidative and glycolytic skeletal muscle fibers from quadriceps muscles of male WT, *Tbx15*<sup>+/-</sup> and *Tbx15*<sup>-/-</sup> mice at 6-8 weeks. Five digital images (20x) from non-overlapping fields were taken from mouse muscle (total 15-20 fields per group), and oxidative and glycolytic muscle fibers separately analyzed. Data are shown as mean ± SEM of 3-4 animals per group. Asterisks indicate a significant differences in all panels (\* p<0.05; \*\*p<0.01 by Mann-Whitney U test)
- b) Distribution of oxidative fiber diameter from WT, *Tbx15*<sup>+/-</sup> and *Tbx15*<sup>-/-</sup> mice from Supplementary Figure 2a. Fiber type distribution is broader in *Tbx15*<sup>+/-</sup> and *Tbx15*<sup>-/-</sup> mice (p<0.05, and p<0.001 by Mann-Whitney U test compared to WT for oxidative fibers).
- c) Distribution of glycolytic fiber diameter from WT, *Tbx15*<sup>+/-</sup> and *Tbx15*<sup>-/-</sup> mice from Supplementary Figure 2a. Fiber type distribution is broader in *Tbx15*<sup>+/-</sup> and *Tbx15*<sup>-/-</sup> mice (p<0.05, and p<0.01 by Mann-Whitney U test compared to WT for glycolytic fibers).
- d) Quantitation of single twitch contraction and tetanic stimulation *ex vivo* normalized to muscle cross sectional area. The ttp (time to peak) is defined as the time interval between the time at which the trace deviates from baseline and the time at which peak force is achieved. T50% and t75% are defined as the time interval between the peak value and the time at which the signal has decayed to 50% and 75% of peak force. Data are shown as mean ± SEM of 8-10 muscle fibers per group.
- e) Quantitation of maximal twitch force of single twitch contraction of EDL fiber bundles *ex vivo* from WT and *Tbx15*<sup>+/-</sup> mice at 3-4 months of age. Data are shown as mean ± SEM of 7-9 muscle fibers per group and are normalized to cross-sectional area of fibers.
- f) Quantitation of maximal tetanic force of single twitch contraction of EDL fiber bundles *ex vivo* from WT and *Tbx15*<sup>+/-</sup> mice at 3-4 months of age. Data are shown as mean ± SEM of 7-9 muscle fibers per group and are normalized to cross-sectional area of fibers.
- g) *Ex vivo* measurements of tetanic twitch force in EDL fiber bundles from WT and *Tbx15*<sup>+/-</sup> mice at 3-4 months of age in response to repeated contraction. Data are shown as mean ± SEM of 7-9 muscle fibers per group and are normalized to cross-sectional area of fibers.
- h) Total distance run of 8 week old *Tbx15*<sup>+/-</sup> and control males on the treadmill in a forced running paradigm. Data are shown as mean ± SEM of 6-8 animals/group.
- i) Grip strength measured in 8 week old *Tbx15*<sup>+/-</sup> and control males. Data are shown as mean ± SEM of 12-14 animals/group.
- j) Daily distance run of 6-9 week old *Tbx15*<sup>+/-</sup> and control males given free access to wheel cages over three weeks. Data are shown as mean ± SEM of 6 animals/group.

# Supplementary Figure 3

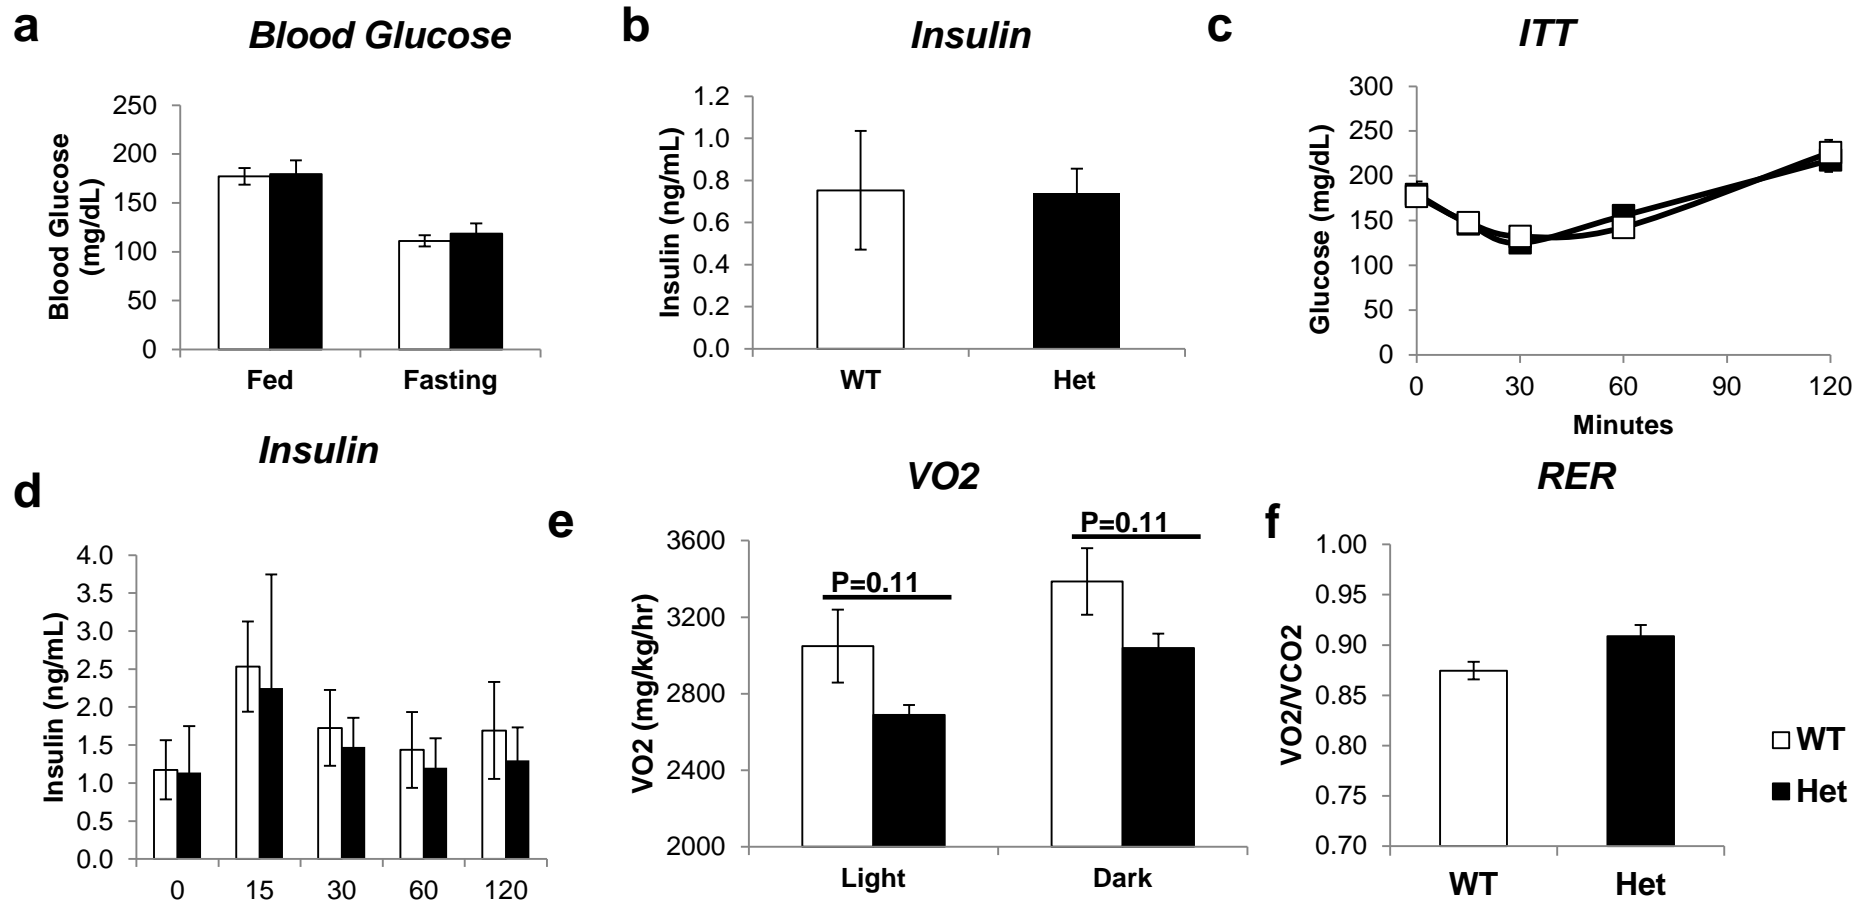

**Supplementary Figure 3. Heterozygous ablation of *Tbx15* leads to reduced energy expenditure but does not alter blood glucose levels, insulin levels, or insulin tolerance.**

a) Blood glucose measurement of 5 month old *Tbx15*<sup>+/-</sup> and control males in the random fed state and after overnight fast. Data are the means ± SEMs of 10-12 animals/group.

b) Serum insulin levels from random-fed 5 month-old *Tbx15*<sup>+/-</sup> and control males. Data are the mean ± SEMs of 6-7 animals per group.

c) Insulin tolerance tests of in 6 month old *Tbx15*<sup>+/-</sup> and control males. Data are the means ± SEMs of 10-12 animals per group. (\* p<0.05 for all panels by Student's t-test)

d) Serum insulin levels as measured during glucose tolerance testing of 5 month-old *Tbx15*<sup>+/-</sup> and control males. Data are shown as mean ± SEM of 6 animals/group.

e) Oxygen consumption during the light and dark phase of the diurnal cycle, as measured by indirect calorimetry in 6 month old *Tbx15*<sup>+/-</sup> and control males. Data are the means ± SEMs of 6 animals per group.

f) Respiratory exchange ratio (RER) in 6 month old *Tbx15*<sup>+/-</sup> and control males during the light phase of the diurnal cycle as measured by indirect calorimetry. Data are the means ± SEMs of 6 animals per group.

# Supplementary Figure 4

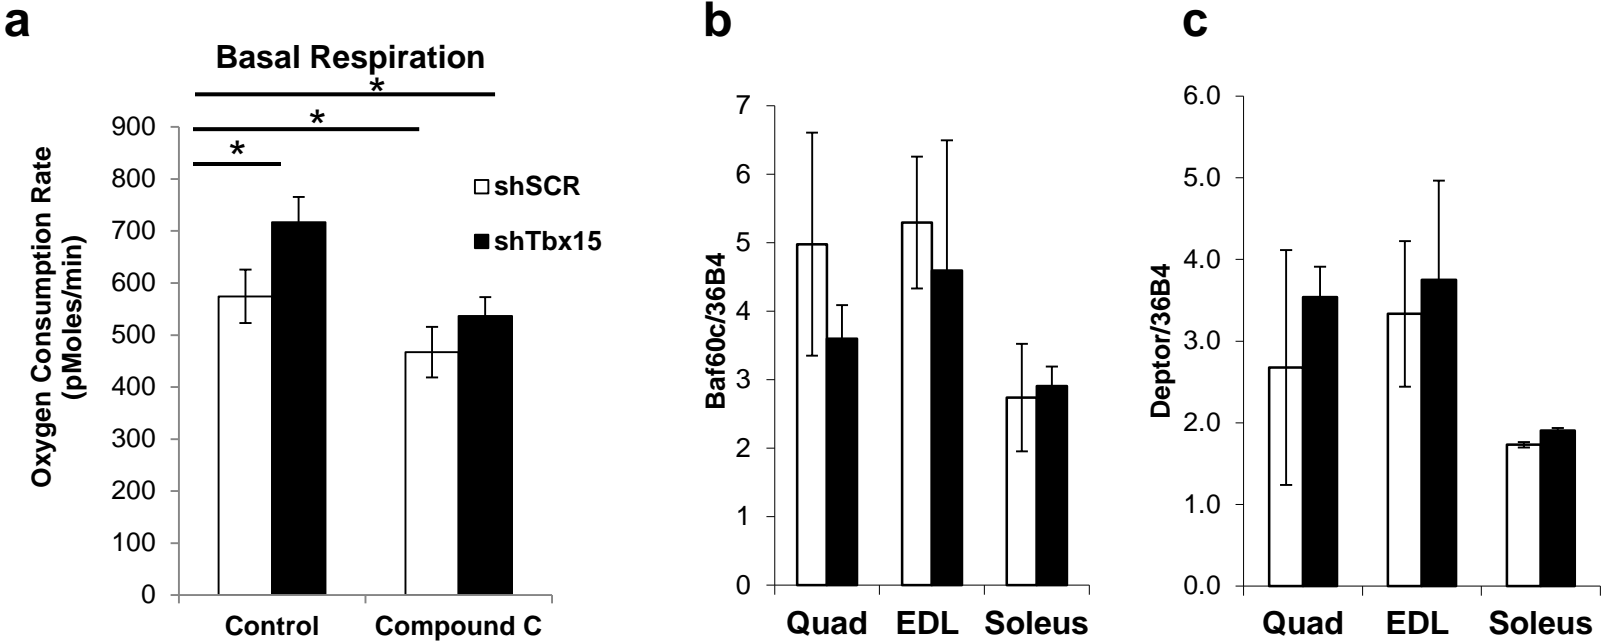

**Supplementary Figure 4. Inhibition of AmpK reduces basal respiration in both *shTbx15* and control C2C12 myoblasts.**

a) Basal respiration of *shTbx15* and control C2C12 myoblasts pretreated with Compound C (20  $\mu$ M) for 2 hours. Values are means  $\pm$  SEM of 5 replicates. The whole experiment was repeated three times. (\* $p < 0.05$  for all panels by Student's t-test)

b-c) qPCR analysis for *Baf60c*, and *Deptor* mRNA of RNA isolated from the tibialis anterior of male wild-type (WT) and *Tbx15*<sup>-/-</sup> at 6-8 weeks of age. Data are shown as mean  $\pm$  SEM of 6 animals per group.

# Supplementary Figure 5

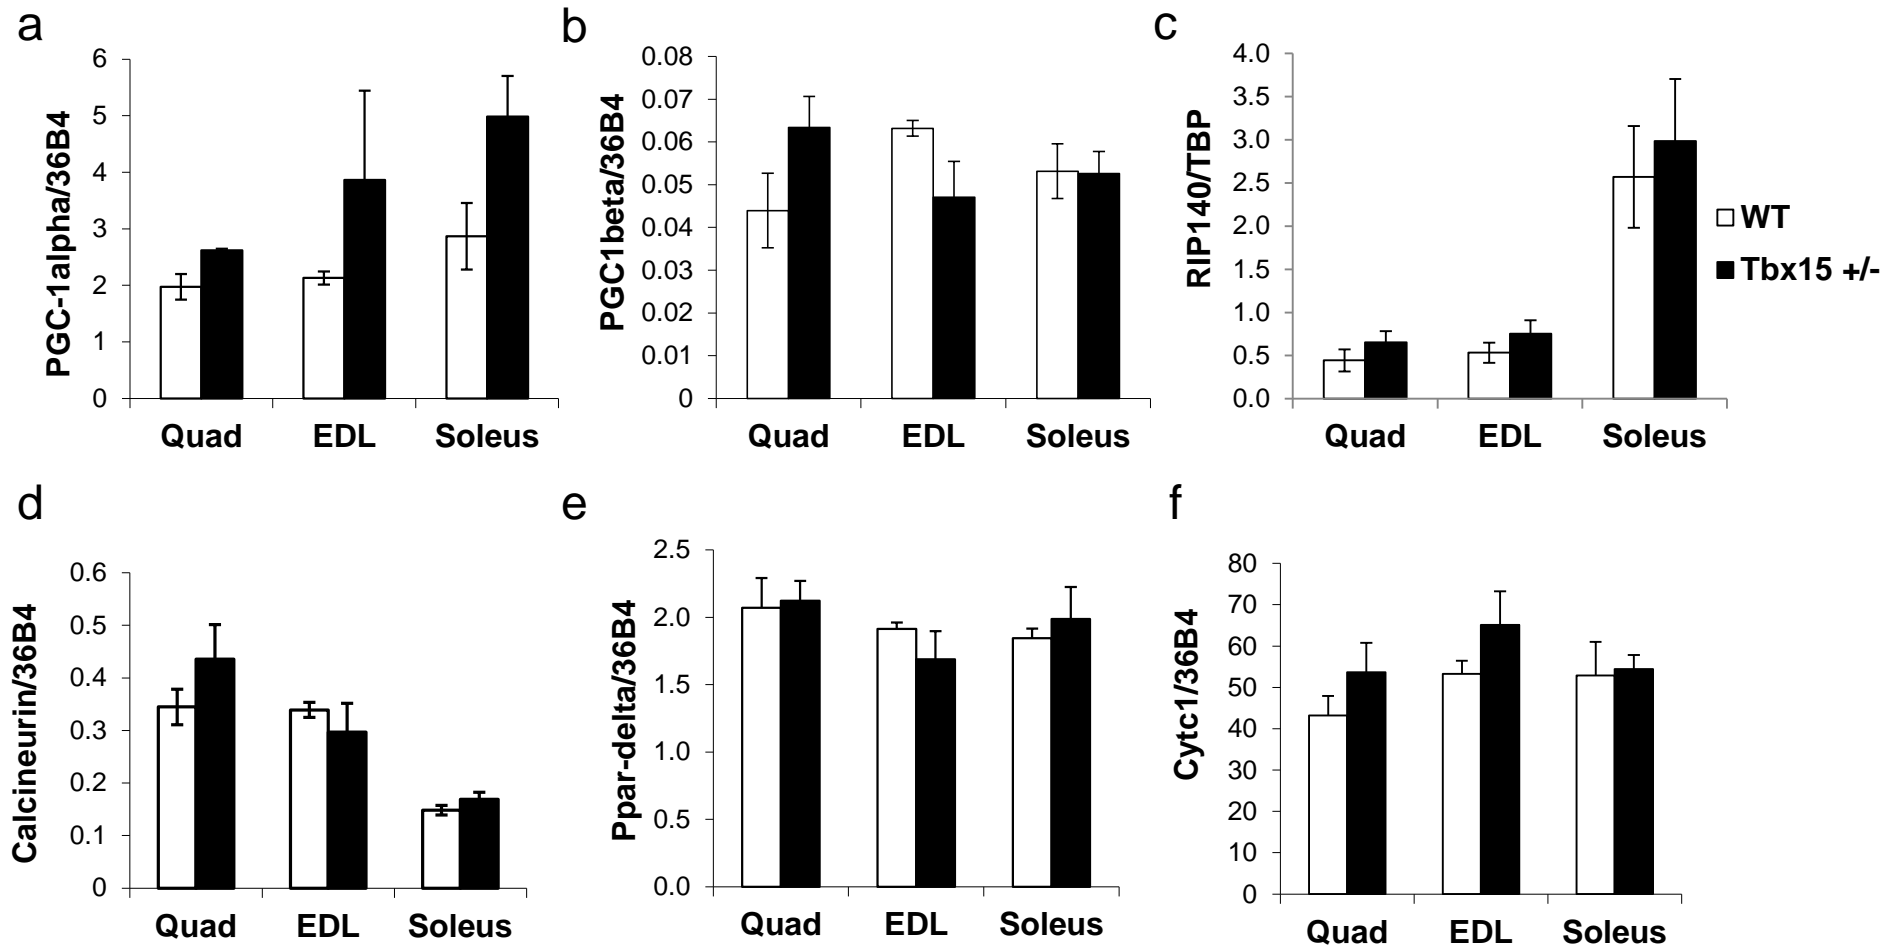

## Supplementary Figure 5. *Tbx15* ablation does not lead to changes in known mediators of muscle fiber-type.

a-f) qPCR analysis of mRNA of known markers of muscle fiber-type of RNA isolated from the tibialis anterior of male wild-type (WT) and *Tbx15*<sup>+/-</sup> at 6-8 weeks of age. Data are shown as mean  $\pm$  SEM of 6 animals per group.

# Supplementary Figure 6a-d

**a** *In Situ* Hybridization of Tbx15 (e14.5)

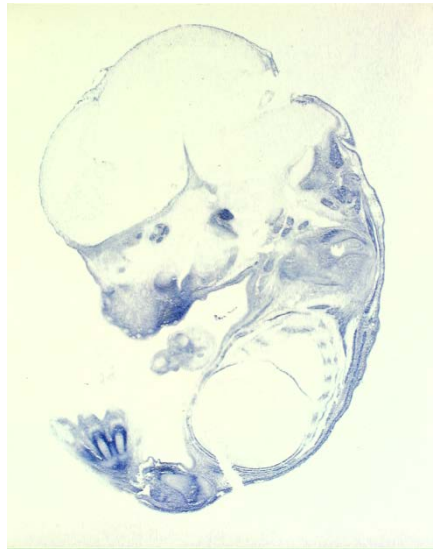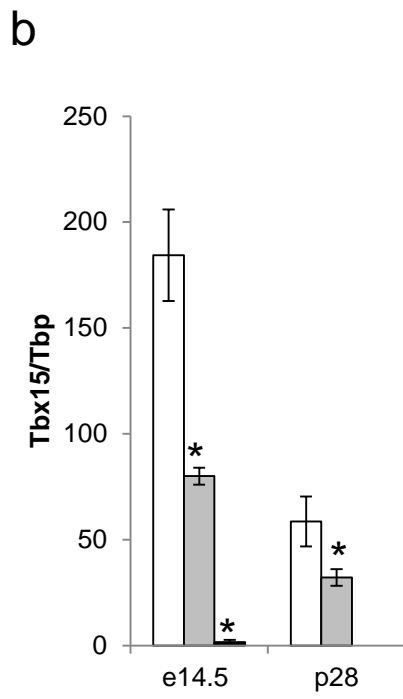

**c**

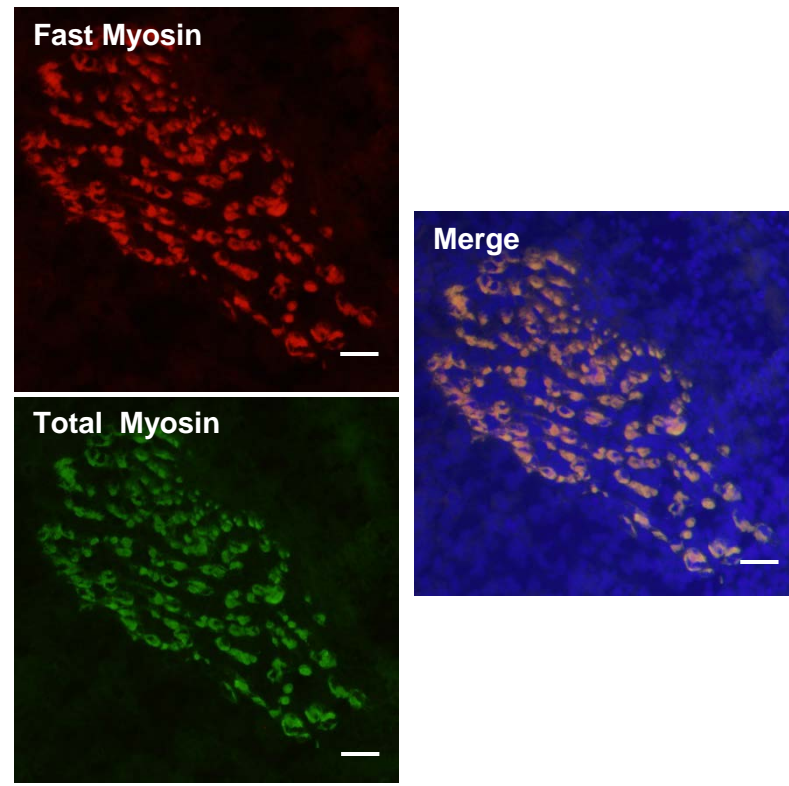

**d**

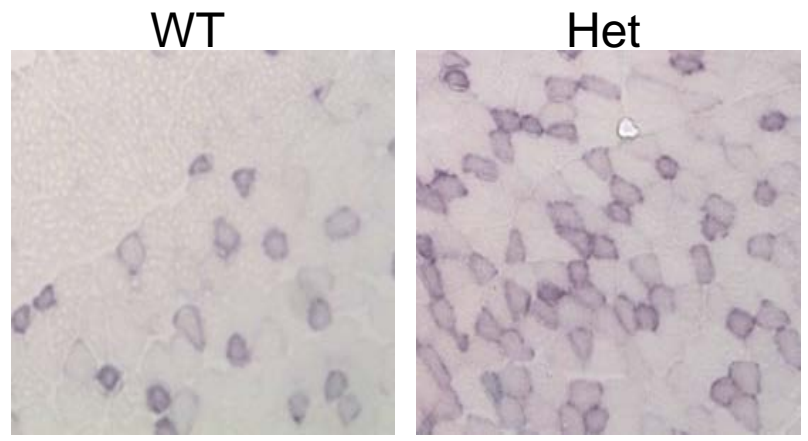



# Supplementary Figure 6e-f

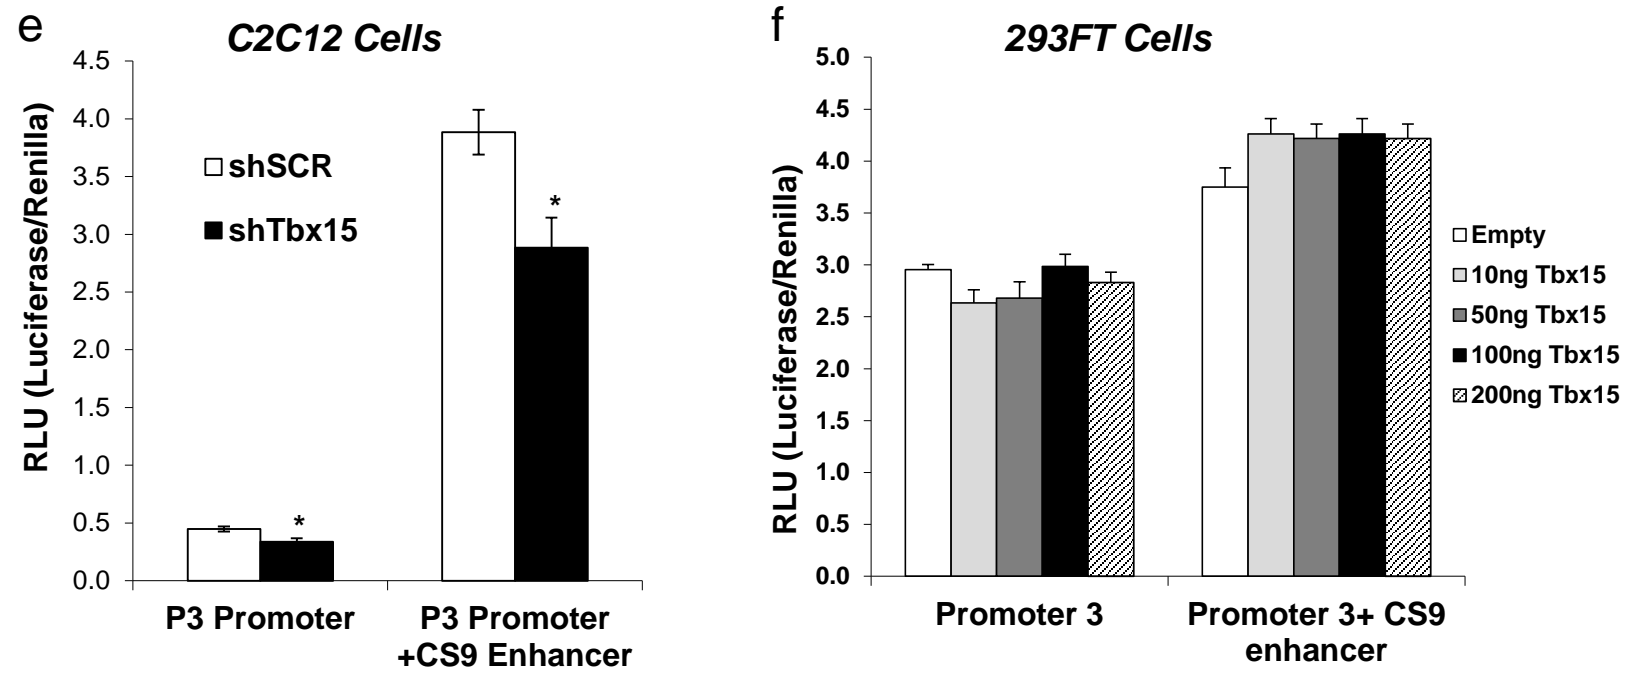

**Supplementary Figure 6. Tbx15 is expressed in developing muscles.**

- a) In situ hybridization for Tbx15 expression on sagittal sections of E14.5 mouse embryos.
- b) Expression level of Tbx15mRNA was compared by qPCR in dissected limb muscle from WT, Tbx15+/- and Tbx15-/- e14.5 embryos and from tibialis anterior skeletal muscle from WT and Tbx15-/- male mice at p28. Values are means ± SEM of 4-6 animals per group.
- c) Immunofluorescence staining for fast myosin isoforms (red) and total myosin isoforms (green) and merged picture from developing muscles in the limb buds of wild-type (WT) E14.5 embryos. Pictures are taken at 10x magnification. Scale bar = 100 μM.
- d) Succinate dehydrogenase (SDH) of tibialis anterior from wild-type (WT) and Tbx15+/- male mice at d28. SDH pictures are taken at 20x.
- e) Luciferase activity of shTbx15 and control C2C12 cells transfected with the IGF-2 muscle specific promoter P3, or P3 with the CS9 distal enhancer. Cells were harvested after 24 hrs and luciferase readings were normalized to Renilla luciferase. Data shown as mean ± SEM of three replicates and was repeated twice. (\*p<0.05 for all panels by Student's t-test)
- f) Luciferase activity of 293FT cells transfected with the IGF-2 muscle specific promoter P3, or P3 with the CS9 distal enhancer. Cells were co-transfected with Tbx15 expression plasmid and harvested after 24 hrs and luciferase readings were normalized to Renilla luciferase. Data shown as mean ± SEM of three replicates and was repeated twice.

# Supplementary Figure 7. Uncropped Western Blots of Key Experiments

Figure 1b. C2C12 Differentiation

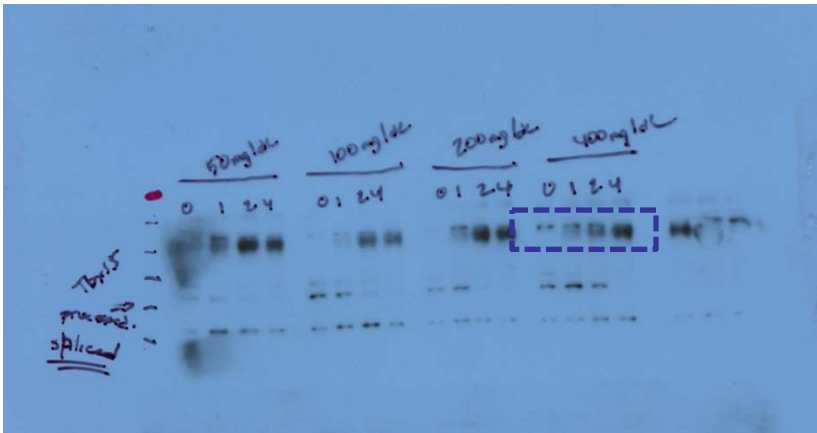

Figure 2a. Tbx15 Levels in Tbx15<sup>+/-</sup> and Tbx15<sup>-/-</sup> Skeletal Muscle

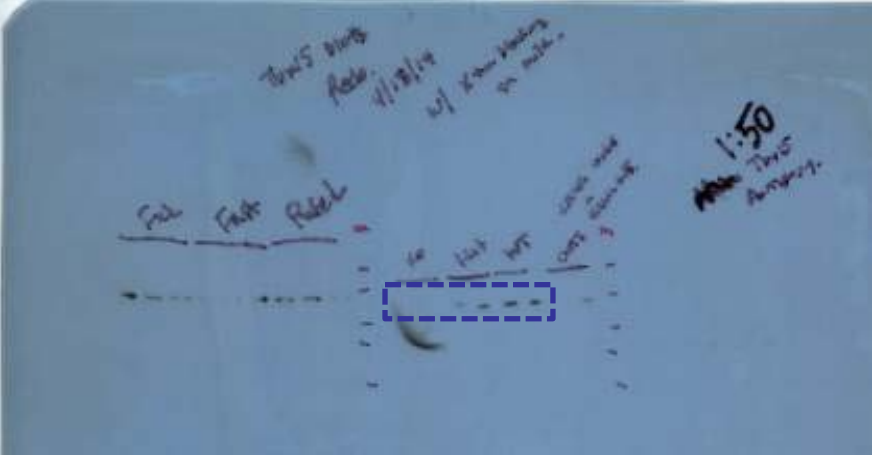

Figure 3c. AMPK Pathway Activation in Tbx15<sup>+/-</sup> Skeletal Muscle

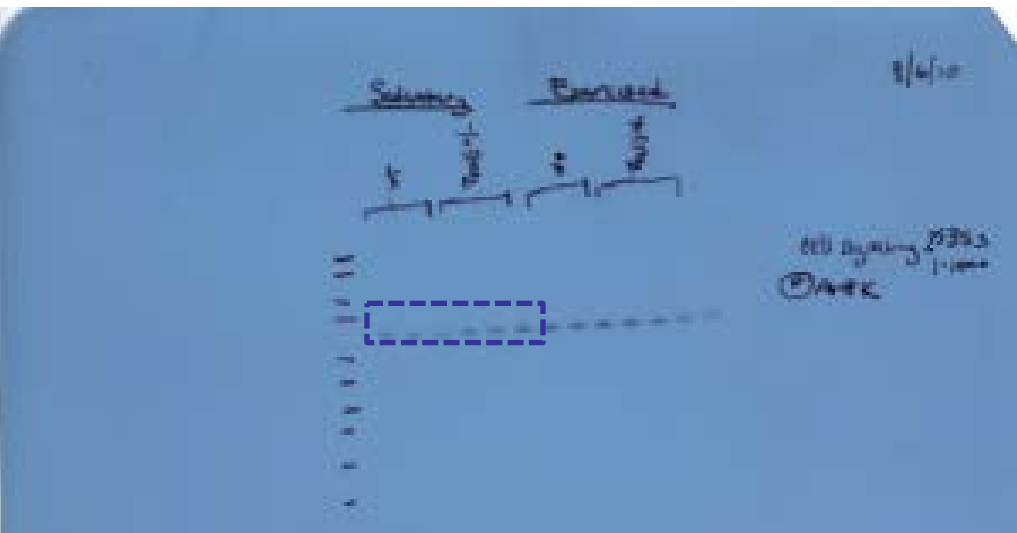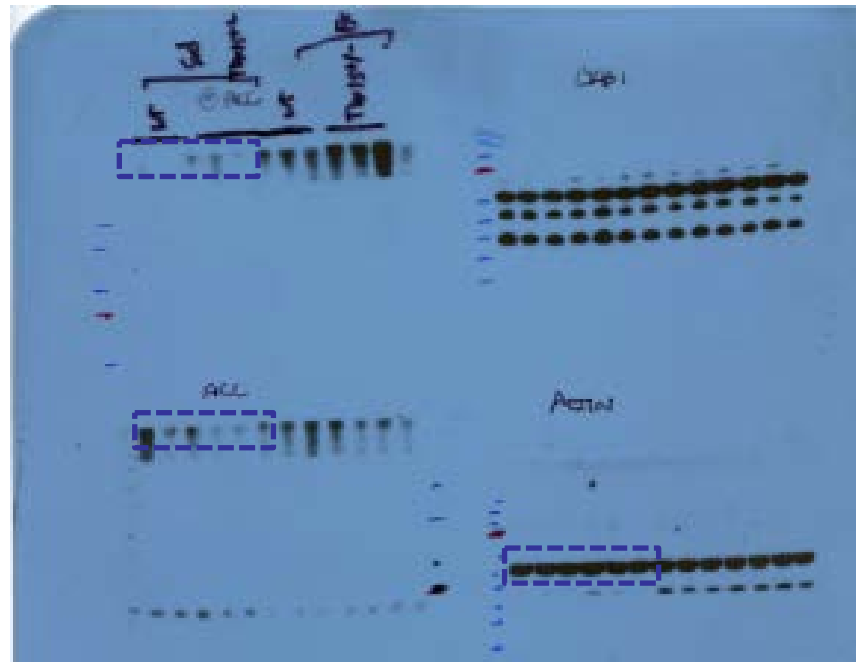

Figure 4e. Inhibition of mTOR and pS6K1 Signaling in Tbx15<sup>+/-</sup> Skeletal Muscle

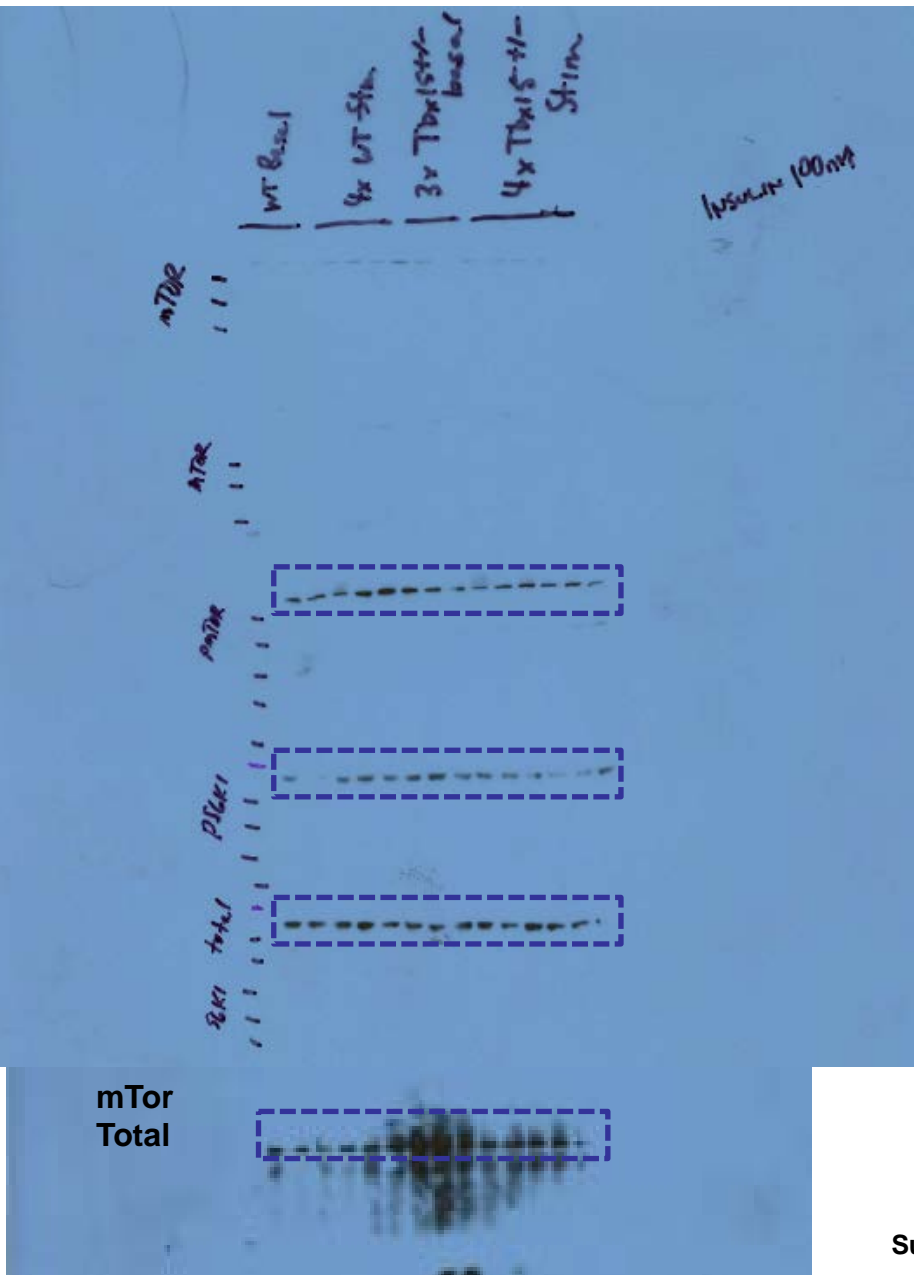

Supplementary Figure 7. Uncropped gels of key Western blot experiments

**Supplementary Table 1. Sequence of qPCR Primers**

| Gene         | Sequence                      |
|--------------|-------------------------------|
| MyoD1 F      | AGCACTACAGTGGCGACTCAGAT       |
| MyoD1 R      | TCCACTATGCTGGACAGGCAGT        |
| Myf5 F       | AATGCCATCCGCTACATTGAGAGC      |
| Myf5 R       | TGTCAAAGCTGCTGTTCTTTTCGGG     |
| Myogenin F   | TTGCTCAGCTCCCTCAACCAGGA       |
| Myogenin R   | AGATTGTGGGCGTCTGTAGGGTCA      |
| Myostatin F  | TGGCTCAAACAGCCTGAATCCAAC      |
| Myostatin R  | TGGGTGTGTCTGTCACCTTGACTION    |
| Baf60c F     | CCGCTCAGCCATTGTCC             |
| Baf60c R     | TGATGACGTGGTTGATCACAAT        |
| Deptor F     | GCTTTGTGGTACGAGGAAGTAA        |
| Deptor R     | TGTTGTGTTGTTCTGGGATAGG        |
| Igf2 F       | GGAGCTTGTTGACACGCTTCAGTT      |
| Igf2 R       | AAGTACGGCCTGAGAGGTAGACA       |
| mTbx15       | TGTTCCGCACTGACCTTTG           |
| mTbx15       | CCAGTGCTGGAGGTGGTT            |
| TBP          | ACCCTTCACCAATGACTCCTATG       |
| TBP          | TGACTGCAGCAAATCGCTTGG         |
| PGC1± F      | TGATGTGAATGACTTGGATACAGACA    |
| PGC1± R      | GCTCATTGTTGTACTIONGGTTGGATATG |
| Rip140 F     | CTCAGCTTCCTTTCCCACATAG        |
| Rip140 R     | GTCTCAGGGAATATGCTGGTTT        |
| Myosin I F   | ACCAGGCCCTTTGACCTCAAGAAA      |
| Myosin I R   | TCTTGTGCGAACTTGGGTGGGTTCT     |
| Myosin IIa F | TCACATCCAACAAGAAGCCAGAGC      |
| Myosin IIa R | CCCTGGCTGACAAATGGGTAATCA      |
| Myosin IIb F | AGTCCCAGGTCAACAAGCTG          |
| Myosin IIb R | TTTCTCCTGTACCTCTCAACA         |
| Sdha F       | ATATGGTGCAGAAGCTCGGAAGGA      |
| Sdha R       | TGTCCACATATGAGAGGGTGTGCT      |

## Supplementary Table 2. Antibodies

| Antibody               | Vendor                    | Catalog Number          |
|------------------------|---------------------------|-------------------------|
| Tbx15                  | Open Biosystems           | Custom Peptide Antibody |
| Tubulin                | Santa Cruz Biotechnology  | H-235                   |
| Myosin Heavy Chain I   | DSHB University of Iowa   | BA-D5                   |
| Myosin Heavy Chain IIa | DSHB University of Iowa   | SC-71                   |
| Myosin Heavy Chain IIb | DSHB University of Iowa   | BF-F3                   |
| phospho AMPK Thr172    | Cell Signaling Technology | 2531                    |
| AMPK                   | Cell Signaling Technology | 2532                    |
| phospho ACC Ser79      | Cell Signaling Technology | 3661                    |
| ACC                    | Cell Signaling Technology | 3662                    |
| Actin                  | Cell Signaling Technology | sc47778                 |
| phospho Akt S473       | Cell Signaling Technology | 9271                    |
| AKT                    | Cell Signaling Technology | 9272                    |
| phospho ERK T202/Y204  | Cell Signaling Technology | 4377                    |
| ERK                    | Cell Signaling Technology | 9102                    |
| phospho mTOR Ser2448   | Cell Signaling Technology | 2971                    |
| mTor                   | Cell Signaling Technology | 2972                    |
| phospho p70S6K1 T389   | Cell Signaling Technology | 9206                    |
| p70S6K1                | Cell Signaling Technology | 2708                    |
| Igf2                   | Abcam                     | ab9574                  |

**Supplementary Table 3. Genes Downregulated in shTbx15 and Upregulated in pBABE-Tbx15**

| Gene Title                                                          | Gene Symbol   | shTbx15/shSCR | pB-Tbx15/pB-Empty |
|---------------------------------------------------------------------|---------------|---------------|-------------------|
| coiled-coil domain containing 7                                     | Ccdc7         | 0.53          | 8.08              |
| killer cell lectin-like receptor, subfamily D, member 1             | Klrd1         | 0.58          | 4.03              |
| serum amyloid A 3                                                   | Saa3          | 0.44          | 2.64              |
| collagen, type VIII, alpha 2                                        | Col8a2        | 0.64          | 2.59              |
| chemokine (C-C motif) ligand 17                                     | Ccl17         | 0.36          | 2.52              |
| kelch repeat and BTB (POZ) domain containing 11                     | Kbtbd11       | 0.30          | 2.48              |
| tetraspanin 11                                                      | Tspan11       | 0.55          | 2.45              |
| dynein, axonemal, intermediate chain 1                              | Dnaic1        | 0.60          | 2.44              |
| a disintegrin and metallopeptidase domain 34                        | Adam34        | 0.62          | 2.42              |
| RIKEN cDNA A730054J21 gene                                          | A730054J21Rik | 0.65          | 2.40              |
| poly(A) binding protein, cytoplasmic 5                              | Pabpc5        | 0.58          | 2.36              |
| RIKEN cDNA E030031F02 gene                                          | E030031F02Rik | 0.58          | 2.31              |
| insulin-like growth factor 2                                        | Igf2          | 0.59          | 2.28              |
| ATPase, H <sup>+</sup> transporting, lysosomal V1 subunit H         | Atp6v1h       | 0.43          | 2.28              |
| transmembrane and immunoglobulin domain containing 1                | Tmigd1        | 0.61          | 2.06              |
| transmembrane protein 132E                                          | Tmem132e      | 0.62          | 2.00              |
| ankyrin repeat domain 39                                            | Ankrd39       | 0.65          | 1.92              |
| keratin 19                                                          | Krt19         | 0.64          | 1.88              |
| Cytochrome P450, family 2, subfamily w, polypeptide 1               | Cyp2w1        | 0.61          | 1.88              |
| pleckstrin                                                          | Plek          | 0.64          | 1.87              |
| ST8 alpha-N-acetyl-neuraminide alpha-2,8-sialyltransferase 1        | St8sia1       | 0.54          | 1.85              |
| thymidylate synthase, pseudogene                                    | Tyms-ps       | 0.49          | 1.84              |
| complement component 1, r subcomponent A                            | C1ra // C1rb  | 0.60          | 1.84              |
| RIKEN cDNA 1810030J14 gene                                          | 1810030J14Rik | 0.48          | 1.74              |
| cytoplasmic polyadenylation element binding protein 2               | Cpeb2         | 0.64          | 1.68              |
| WD repeat domain 76                                                 | Wdr76         | 0.53          | 1.66              |
| placenta-specific 8                                                 | Plac8         | 0.52          | 1.66              |
| RIKEN cDNA 1700123K08 gene                                          | 1700123K08Rik | 0.57          | 1.64              |
| insulin-like growth factor binding protein 4                        | Igfbp4        | 0.44          | 1.63              |
| solute carrier family 2 (facilitated glucose transporter), member 3 | Slc2a3        | 0.61          | 1.61              |
| Crx opposite strand transcript 1                                    | Crxos1        | 0.38          | 1.58              |
| phospholipase C, beta 1                                             | Plcb1         | 0.64          | 1.58              |
| RIKEN cDNA 1500005C15 gene                                          | 1500005C15Rik | 0.64          | 1.57              |
| potassium channel tetramerisation domain containing 12b             | Kctd12b       | 0.52          | 1.57              |
| piwi-like homolog 4 (Drosophila)                                    | Piwil4        | 0.61          | 1.56              |
| butyrophilin-like 9                                                 | Btnl9         | 0.39          | 1.54              |
| GTP cyclohydrolase 1                                                | Gch1          | 0.62          | 1.54              |
| ceruloplasmin                                                       | Cp            | 0.59          | 1.50              |

**Supplementary Table 4. Genes Upregulated in shTbx15 and Downregulated in pBABE-Tbx15**

| Gene Title                                                                 | Gene Symbol         | shTbx15/shSCR | pB-Tbx15/pB-Empty |
|----------------------------------------------------------------------------|---------------------|---------------|-------------------|
| hemoglobin alpha, adult chain 1 /// hemoglobin alpha, adult chain 2        | Hba-a1 /// Hba-a2   | 1.59          | 0.34              |
| Homeobox A10                                                               | Hoxa10              | 1.58          | 0.42              |
| leucine rich repeat protein 1, neuronal                                    | Lrrn1               | 1.70          | 0.47              |
| SRY-box containing gene 4                                                  | Sox4                | 1.50          | 0.50              |
| thiosulfate sulfurtransferase (rhodanese)-like domain containing 1         | Tstd1               | 2.76          | 0.50              |
| oxysterol binding protein 2                                                | Osbp2               | 1.49          | 0.52              |
| nebulin                                                                    | Nebi                | 1.47          | 0.55              |
| guanylate binding protein 2                                                | Gbp2                | 1.48          | 0.55              |
| regulator of calcineurin 1                                                 | Rcan1               | 1.43          | 0.56              |
| sarcolemma associated protein                                              | Simap               | 1.74          | 0.58              |
| Rho-related BTB domain containing 1                                        | Rhobtb1             | 1.52          | 0.58              |
| similar to Transmembrane gamma-carboxyglutamic acid protein 4 precursor (P | LOC676960 /// Prrg4 | 1.99          | 0.58              |
| RIKEN cDNA B230216G23 gene                                                 | B230216G23Rik       | 1.95          | 0.60              |
| major facilitator superfamily domain containing 6                          | Mfsd6               | 1.48          | 0.62              |
| pleckstrin homology domain interacting protein                             | Phip                | 1.47          | 0.62              |
| UDP-glucose ceramide glucosyltransferase                                   | Ugcg                | 1.64          | 0.62              |
| RIKEN cDNA 1600029D21 gene                                                 | 1600029D21Rik       | 1.99          | 0.63              |
| Kv channel interacting protein 4                                           | Kcnip4              | 1.54          | 0.63              |
| poliovirus receptor                                                        | Pvr                 | 1.69          | 0.65              |
| ring finger protein 144B                                                   | Rnf144b             | 1.53          | 0.65              |
| beta galactoside alpha 2,6 sialyltransferase 1                             | St6gal1             | 1.60          | 0.66              |
| progesterone and adipoQ receptor family member VIII                        | Paqr8               | 1.83          | 0.66              |
